# Supplementary figures and images for: PROZ Associated with Sorafenib Sensitivity May Serve as a Potential Target to Enhance the Efficacy of Combined Immunotherapy for Hepatocellular Carcinoma
Source: MDPI journal article supplement (doi:10.3390/genes13091535), 2022-08-26

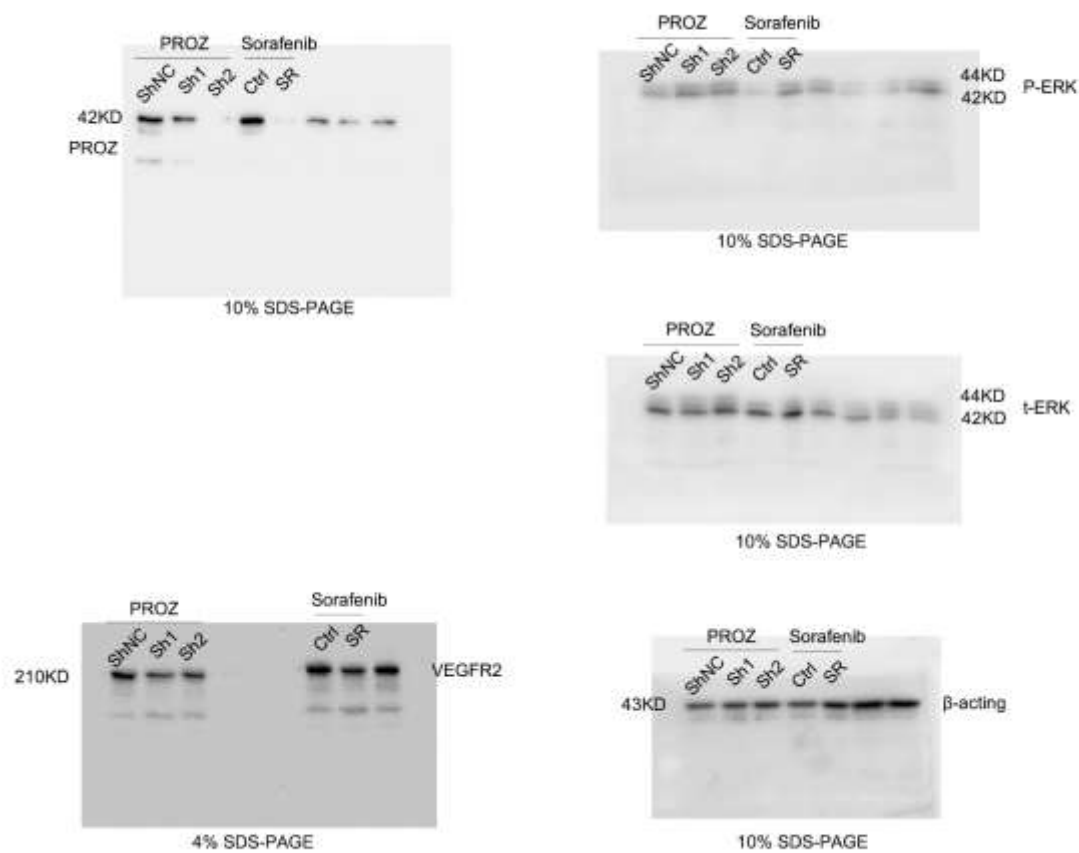

**Figure S1.** All bands and molecular weight markers of western blot.

Supplement: s1 [file s1]
